# Supplementary material for: Tissue-specific regulation of translational readthrough tunes functions of the traffic jam transcription factor
Source: PubMed Central journal article supplement — Nucleic Acids Res. 2021 Dec 13;50(11):6001–19. doi: 10.1093/nar/gkab1189 (PMC9226519; doi:10.1093/nar/gkab1189), 2021-12-13
Supplement: gkab1189_supplemental_file.pdf [file gkab1189_supplemental_file.pdf]

## Supplementary Figures and Tables for

### Tissue-specific regulation of translational readthrough tunes functions of the traffic jam transcription factor

Prajwal Karki<sup>1</sup>, Travis D. Carney<sup>2</sup>, Cristina Maracci<sup>1</sup>, Andriy S. Yatsenko<sup>2</sup>, Halyna R. Shcherbata<sup>2\*</sup>, and Marina V. Rodnina<sup>1\*</sup>

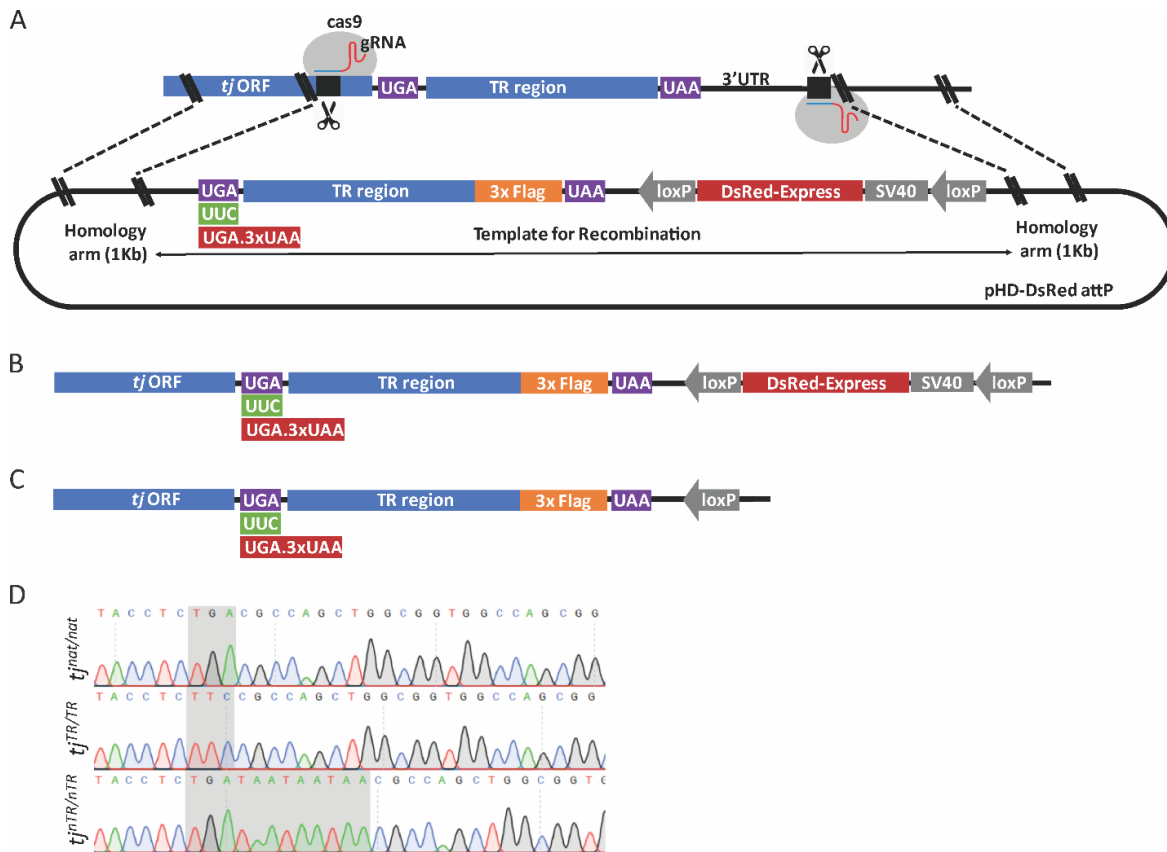

Figure S1. Construct design for CRISPR/Cas9-mediated genome editing to create *tj*-TR mutants, A. Gene locus surrounding the TR region of *tj* with proximal and distal PAM (protospacer adjacent motif) sites for guide RNA (gRNA)-directed Cas9 cleavage depicted above the modified pHD-DsRed attP vector containing the Template for Recombination (TfR) flanked by 1-Kb homology arms. Dotted lines represent the region of homology between the gene locus and modified vector. The TfR contains the modifications that introduce the desired mutations at the primary *tj* stop codon, 3xFlag upstream of the second stop codon and a loxP flanked *DsRed* marker. B. Sequence depicting the modifications introduced in the *tj* locus in *tj*-TR mutants post-CRISPR/Cas9 editing. C. Restoration of the native 3' UTR in *tj*-TR mutants via Cre recombinase-mediated removal of the loxP-flanked DsRed marker. D. Sequence verification of *tj*<sup>nat</sup>, *tj*<sup>TR</sup> and *tj*<sup>nTR</sup> mutations in homozygous mutant flies.

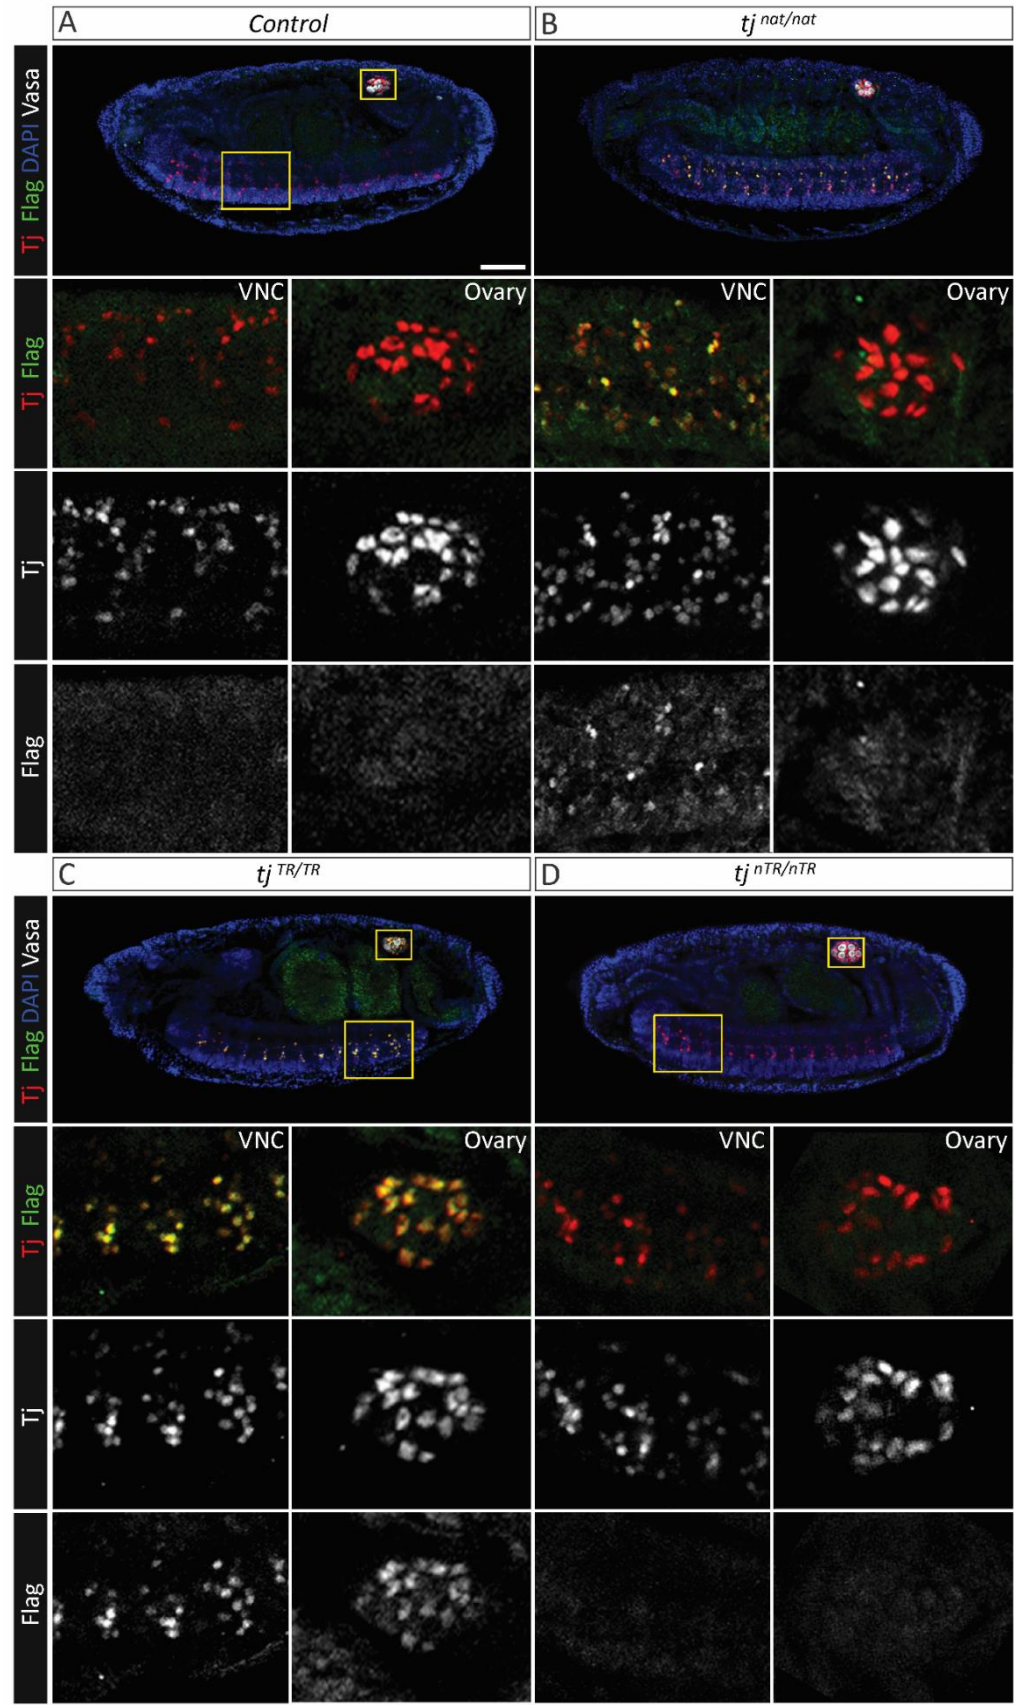

Figure S2. Tissue-specific regulation of TR in *tj* during embryogenesis. Stage 15-17 embryos are stained with the nuclear stain DAPI (blue), anti-Tj (red), and anti-Flag (green) antibodies, as well as anti-Vasa to mark the ovaries (greyscale). Anterior is to the left and dorsal is up in all images. Embryos of all genotypes express Tj in neural cells of the embryonic ventral nerve cord [VNC, lower yellow boxes in A-D] as well as in somatic gonadal precursor cells (SGPs) of embryonic ovaries [small upper yellow boxes in A-D]. Below each whole embryo image are enlargements of VNC and ovary tissues. Individual channels for anti-Tj and anti-Flag in greyscale as well as the overlapping channel are shown. A. Control embryos do not express Flag in any tissues. B. In *tj<sup>nat/nat</sup>* embryos, the Flag-tagged Tj-TR isoform is selectively expressed in the embryonic VNC and excluded from ovaries. C. *tj<sup>TR/TR</sup>* embryos exhibit constitutive expression of the Tj-TR isoform in both VNC and ovary. D. *tj<sup>TR/nTR</sup>* embryos do not express the Tj-TR isoform in any tissues. Scale bar: 50  $\mu\text{m}$ .



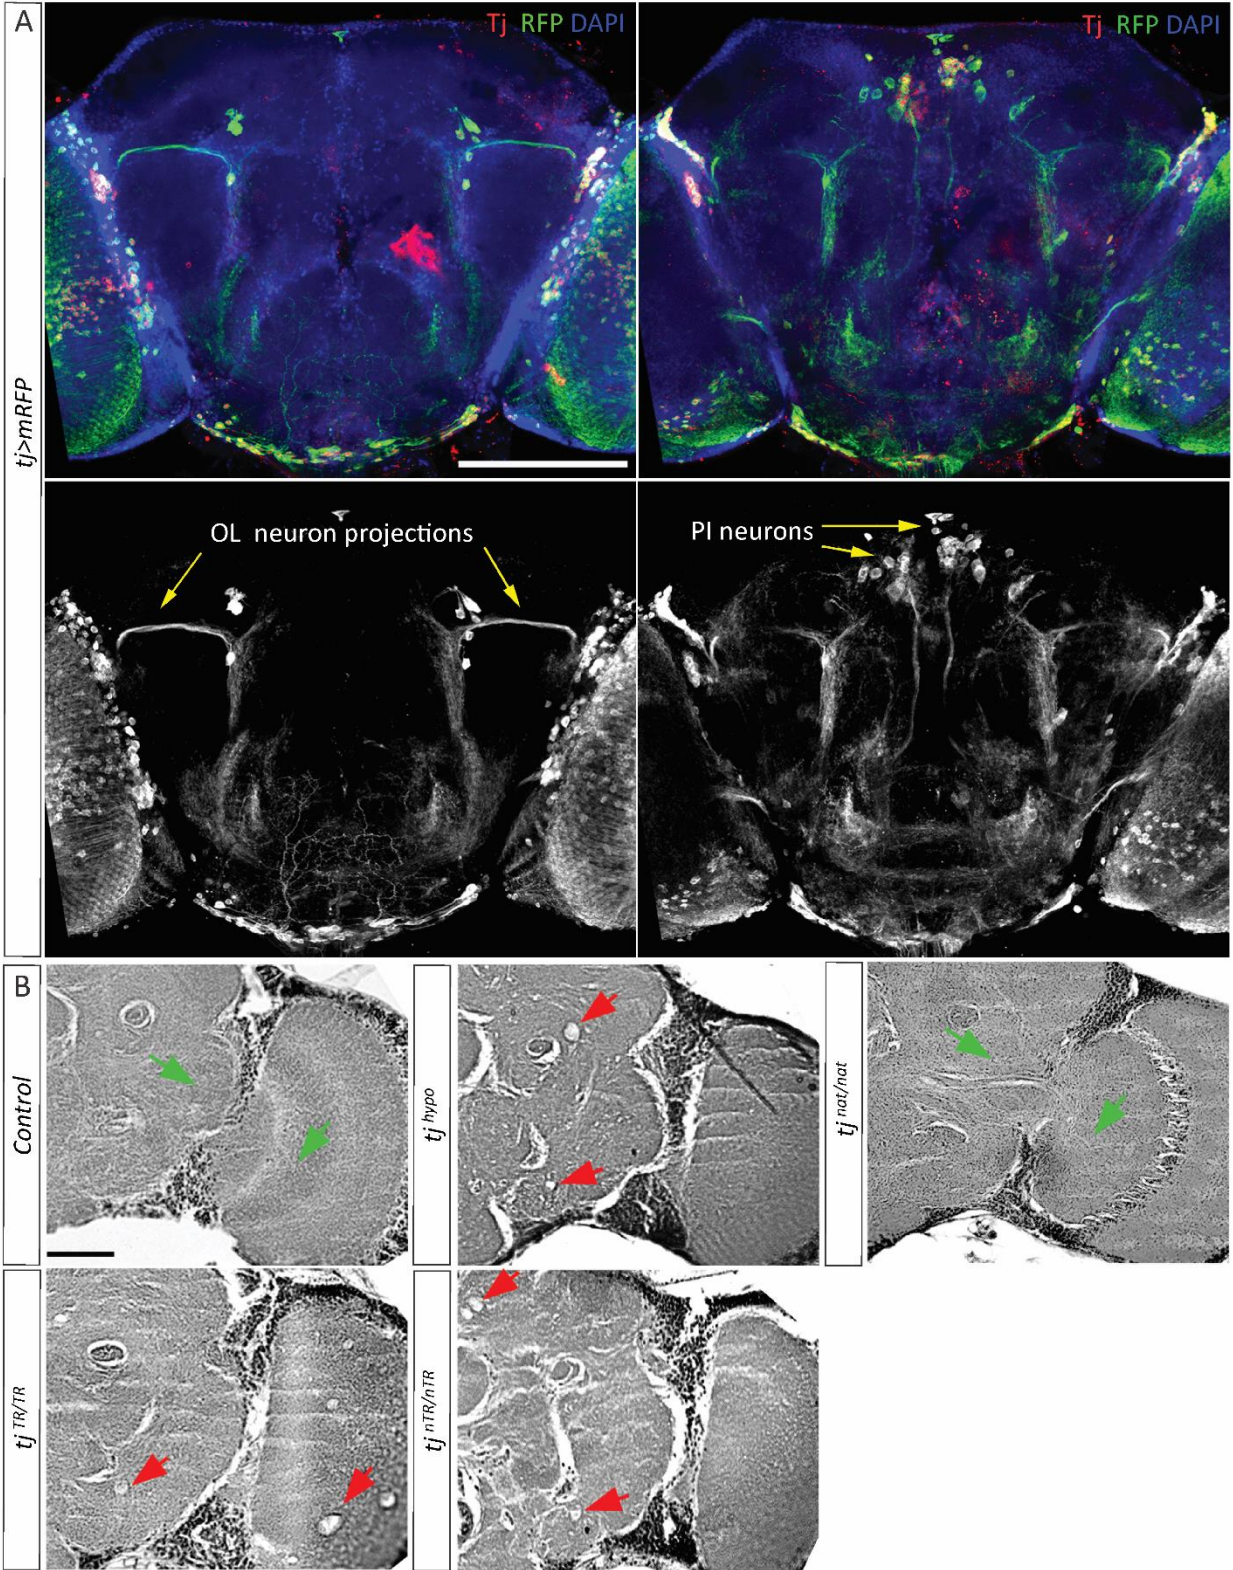

Figure S3. Visualization of Tj and Tj-TR isoforms in adult brains from *tj*-TR mutants. A. Membrane-bound RFP was expressed under the control of *tj-Gal4*, an enhancer trap that closely mimics the endogenous expression pattern of *tj*. RFP marks cell bodies as well as neuronal projections of *tj*-expressing cells. Left panels depict projection patterns in an anterior slice from a z-stack of a whole brain, and the right panels depict a more posterior slice (RFP alone is shown in greyscale panels). Many cells of the retina and OL express RFP, as do a smaller number of CB neurons. In particular, OL neuronal projections extend into the CB (left panels), and a subset of *pars intercerebralis* (PI) neurons are visible near the brain midline (right panels). B. H&E-stained brain sections illustrate wild-type appearance with homogeneous staining (green arrows) in Control and *tj<sup>nat/nat</sup>* brains, as well as sporadic lesions (red arrows) in *tj<sup>hypo</sup>*, *tj<sup>TR/TR</sup>*, and *tj<sup>nTR/nTR</sup>* brains. Scale bar: 100  $\mu$ m

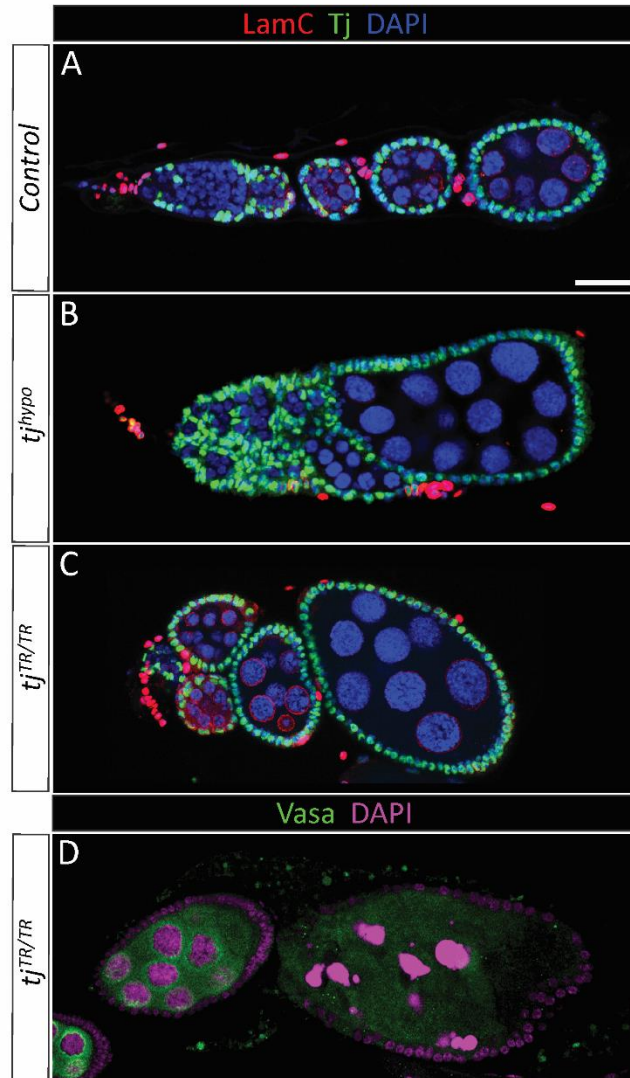

Figure S4. Forced *tj* TR causes various strong ovarian phenotypes similar to those in *tj* hypomorphic ovaries. a. Control ovariole stained for the nuclear marker DAPI as well as anti-Tj and anti-LamC. Anti-LamC is a nuclear envelope marker that strongly stains TFCs and CpCs as well as stalk cells (the cells that connect adjacent egg chambers) and more weakly marks nurse cells. It is also visible in the nuclei of the muscle cells that surround each ovariole. b. A *tj* hypomorphic ovariole exhibiting a strong disorganization phenotype. The egg chambers are not properly separated, and the germarium is very small or absent. Note that a LamC-positive TF is still visible at the anterior tip (to the left of the panel). c. A *tj<sup>TR/TR</sup>* germarium with a very small germarium. Similar to the hypomorph, the TF is still present. d. A *tj<sup>TR/TR</sup>* germarium exhibiting cell death in the germline of the larger egg chamber, evidenced by the strongly condensed and fragmented DAPI staining. Scale bar: 20  $\mu$ m.

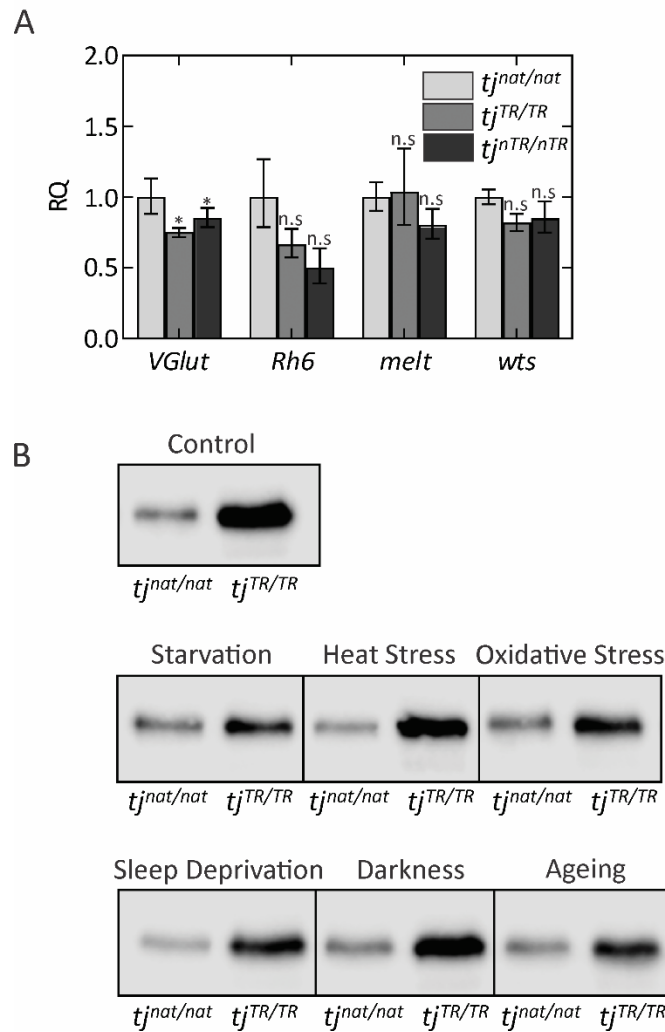

Figure S5. Effect of TR in *tj* on transcriptome profile and response to stress. A. RT-qPCR analysis of genes regulated by Tj in *tj*-TR mutants using cDNA prepared from adult heads. Error bars represent the upper and lower limits of RQ values defined by the standard deviation of  $\Delta\Delta C_T$ . The data were normalized against average  $\Delta C_T$  of the housekeeping gene *aTub84B*. p-values were calculated using two-tailed Student's t-test from  $\Delta\Delta C_T$  of *tj<sup>nat/nat</sup>* vs *tj<sup>TR/TR</sup>* and *tj<sup>nat/nat</sup>* vs *tj<sup>nTR/nTR</sup>* samples (\* $p < 0.05$ , n.s., not significantly different) B. Western blot images used to quantify TR efficiency of Tj upon exposure to various stressors. The two bands in each box represent signal from anti-Flag antibodies that show the relative abundance of Flag-tagged Tj-TR isoform in adult heads from *tj<sup>nat/nat</sup>* and *tj<sup>TR/TR</sup>*.



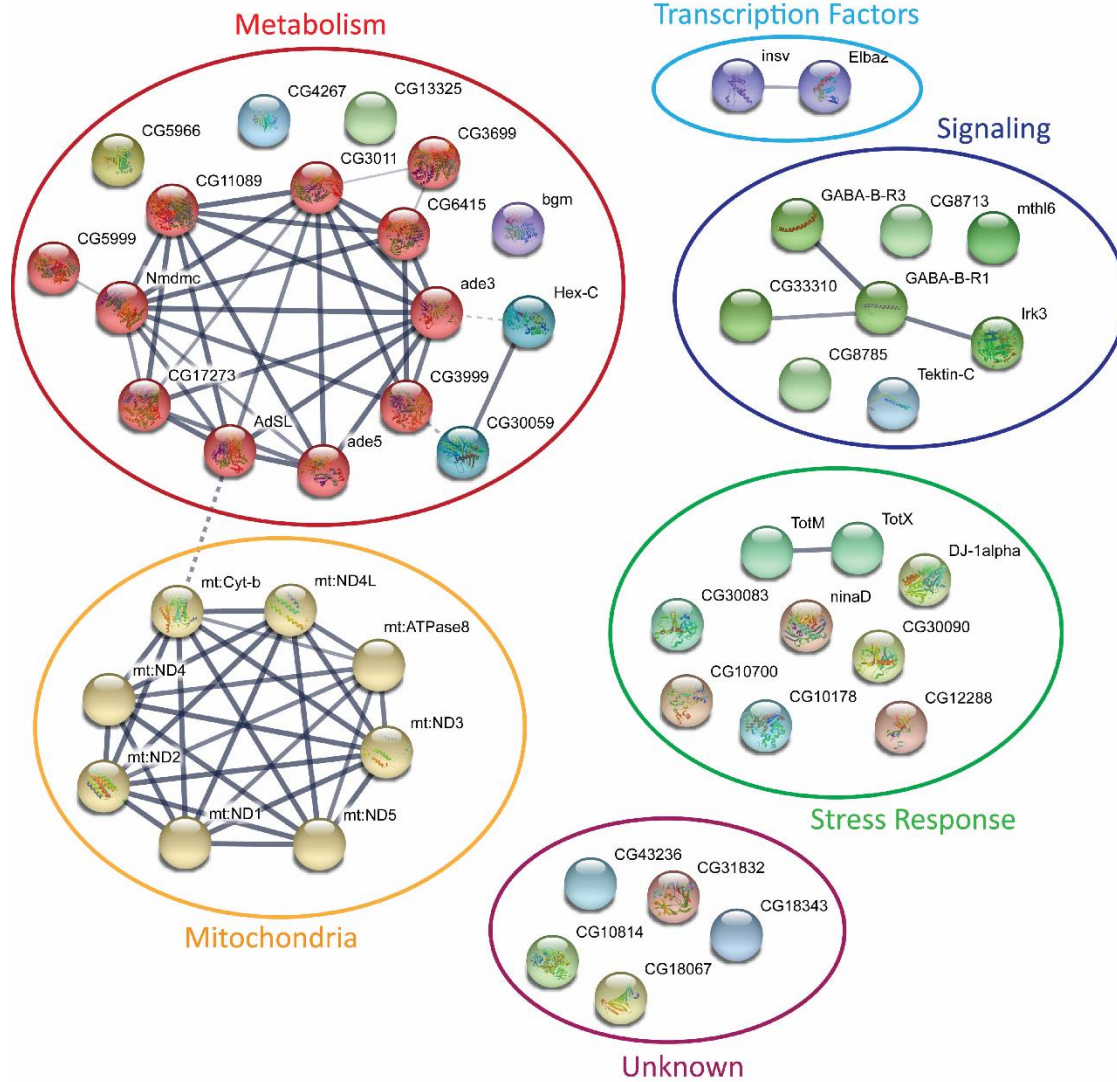

Figure S6. STRING interaction diagram of the genes deregulated in the *tj*-TR mutants. Each node represents a gene that was identified to be deregulated among the three *tj*-TR mutants in high-throughput RNA sequencing analysis of brain samples. The threshold for dysregulation, upon comparing the expression levels between each mutant was set to be  $>+1$  or  $<-1$   $\log_2$  fold change. Pairwise comparisons were made between  $tj^{na/nat}$ ,  $tj^{TR/TR}$  and  $tj^{nTR/nTR}$  in all permutations.



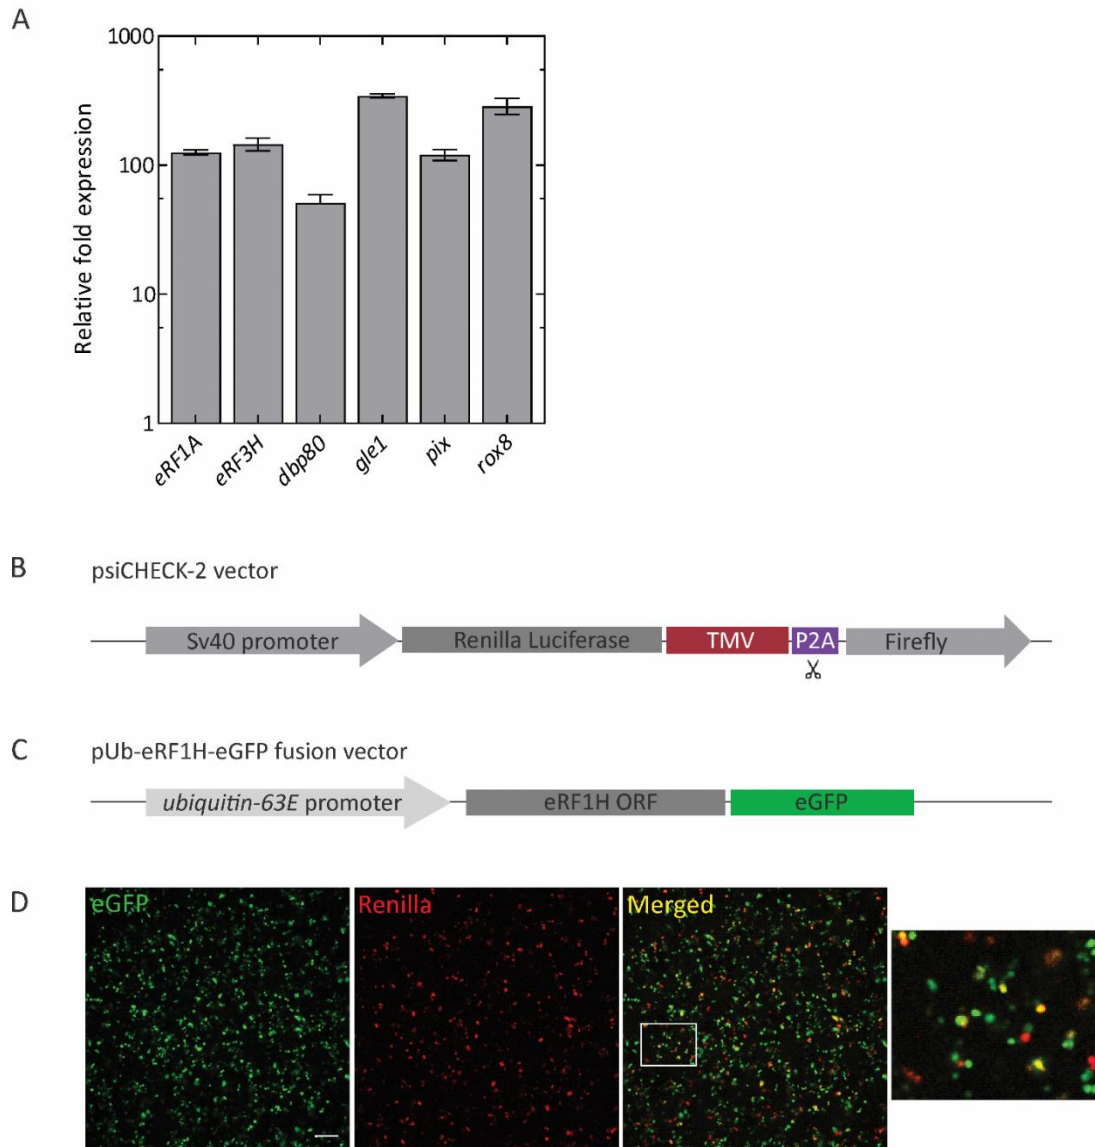

Figure S7. Expression of psiCHECK-2 and pUb vectors in S2 cells. A. RT-qPCR quantification of over-expression of various factors upon transfecting S2 cells with pUb expression vectors. The  $C_T$  values for each test transcript were normalized against the respective  $C_T$  values of *aTub84B*. The  $\Delta C_T$  values obtained from transfected cells were then compared to the corresponding  $\Delta C_T$  values obtained for each test transcript from untransfected cells to derive  $\Delta\Delta C_T$ . Error bars represent the upper and lower limit of RQ defined by the standard deviation of  $\Delta\Delta C_T$  from three technical replicates. B. Construct design for psiCHECK-2 vector containing TMV test cassette. C. pUb vector expressing eRF1H-eGFP fusion product. D. S2 cells co-transfected with vectors B and C observed for eGFP fluorescence and *Renilla* luminescence.  $45.4 \pm 6.3\%$  of cells that are positive for *Renilla* luminescence express eRF1H-eGFP, while  $21.7 \pm 1.6\%$  of eGFP positive cells exhibit *Renilla* luminescence. Scale bar: 50  $\mu\text{m}$ .

Table S1. List of candidates selected for TR validation

| <b>ene</b>              | <b>Flybase ID</b> | <b>TR length, codons</b> | <b>Region Profile</b> | <b>Peptide feature</b>         | <b>Expression</b>                                                                             |
|-------------------------|-------------------|--------------------------|-----------------------|--------------------------------|-----------------------------------------------------------------------------------------------|
| <b><i>br-RP</i></b>     | FBtr0330406       | 131                      | Ala/Gly/His rich      | Disordered                     | Embryonic/larval CNS                                                                          |
| <b><i>klu-RB</i></b>    | FBtr0330080       | 15                       | -                     | -                              | Embryonic neuroblasts, larval CNS                                                             |
| <b><i>chinmo-RE</i></b> | FBtr0303933       | 236                      | Thr rich              | BTB domain, disordered         | Embryonic/larval nervous system, eye disc, adult testes                                       |
| <b><i>wit-RB</i></b>    | FBtr0330072       | 10                       | -                     | -                              | Embryonic/larval/adult CNS, midgut, eye, salivary gland                                       |
| <b><i>dsx-RE</i></b>    | FBtr0330074       | 23                       | -                     | Non-cytoplasmic/signal peptide | Embryonic gonad, embryonic/larval/adult CNS, testis                                           |
| <b><i>Khc-73-RE</i></b> | FBtr0329957       | 58                       | -                     | -                              | Enriched in larval/pupal CNS, ubiquitous                                                      |
| <b><i>fru-RO</i></b>    | FBtr0330040       | 187                      | Gln/Asn rich          | Polar, disordered              | Ubiquitous in embryos, larval/pupal/adult CNS                                                 |
| <b><i>svp-RE</i></b>    | FBtr0331183       | 11                       | -                     | -                              | Embryonic neuroblasts, larval photoreceptor cells, fat body, adult optic lobe, photoreceptors |
| <b><i>aPKC-RL</i></b>   | FBtr0329889       | 131                      | Asn/Gln rich          | Polar, disordered              | Ubiquitous in early embryos, larval/pupal/adult CNS                                           |
| <b><i>dlg1-RR</i></b>   | FBtr0330390       | 41                       | -                     | -                              | Embryonic/larval/adult CNS, salivary glands, fat bodies                                       |
| <b><i>tj-rC</i></b>     | FBtr0329891       | 44                       | -                     | Disordered                     | Gonadal somatic cells, embryonic/larval CNS                                                   |

Table S2. Forced TR of Tj affects germarium and GSC niche morphology

| <b>Genotype</b>             | <b>Observed germaria phenotypes</b>  |                          |                        | <b>p-value</b>                                                           | <b>Number of germaria analyzed</b> |
|-----------------------------|--------------------------------------|--------------------------|------------------------|--------------------------------------------------------------------------|------------------------------------|
|                             | <b>Normal</b>                        | <b>Deformed</b>          | <b>Small</b>           |                                                                          |                                    |
| <i>tj<sup>nat/nat</sup></i> | 91%                                  | 5%                       | 4%                     |                                                                          | 128                                |
| <i>tj<sup>TR/TR</sup></i>   | 31%                                  | 18%                      | 51%                    | <sup>1</sup> p=2.7e <sup>-21</sup><br><sup>2</sup> p=1.1e <sup>-15</sup> | 146                                |
| <i>tj<sup>nTR/nTR</sup></i> | 80%                                  | 10%                      | 10%                    | <sup>1</sup> p=0.155                                                     | 153                                |
| <b>Genotype</b>             | <b>Observed GSC niche phenotypes</b> |                          |                        | <b>p-value</b>                                                           | <b>Number of niches analyzed</b>   |
|                             | <b>Normal</b>                        | <b>Small&amp; Absent</b> | <b>Large&amp;Fused</b> |                                                                          |                                    |
| <i>tj<sup>nat/nat</sup></i> | 96%                                  | 2%                       | 2%                     |                                                                          | 122                                |
| <i>tj<sup>TR/TR</sup></i>   | 33%                                  | 56%                      | 11%                    | <sup>1</sup> p=8.7e <sup>-25</sup><br><sup>2</sup> p=1.5e <sup>-05</sup> | 147                                |
| <i>tj<sup>nTR/nTR</sup></i> | 88%                                  | 9%                       | 3%                     | <sup>1</sup> p=0.215                                                     | 138                                |

For comparison of the observed germaria phenotypes, two-way tables and  $\chi^2$ -test were used.

<sup>1</sup> – compared to *tj<sup>nat/nat</sup>*

<sup>2</sup> – compared to *tj<sup>nTR/nTR</sup>*

Table S3. Genes identified to be dysregulated in *tj*-TR mutants

| <i>tj<sup>nat/nat</sup> vs tj<sup>TR/TR</sup></i> |            |                  |          |
|---------------------------------------------------|------------|------------------|----------|
| Gene ID                                           | Gene Name  | Log2 fold change | p-value  |
| FBgn0013673                                       | mt:ATPase8 | -2.12            | 4.44E-67 |
| FBgn0013680                                       | mt:ND2     | -1.69            | 6.85E-47 |
| FBgn0033792                                       | CG13325    | -1.43            | 2.58E-34 |
| FBgn0029831                                       | CG5966     | -1.16            | 3.84E-21 |
| FBgn0013683                                       | mt:ND4L    | -1.08            | 5.83E-19 |
| FBgn0260446                                       | GABA-B-R1  | -1.03            | 2.58E-29 |
| FBgn0033830                                       | CG10814    | -1.00            | 3.77E-20 |
| FBgn0027348                                       | bgm        | 1.02             | 2.72E-26 |
| FBgn0033760                                       | CG8785     | 1.03             | 3.57E-17 |
| FBgn0031435                                       | Elba2      | 1.08             | 9.90E-19 |
| FBgn0033683                                       | CG18343    | 1.31             | 2.24E-31 |
| FBgn0032620                                       | CG12288    | 1.33             | 2.17E-29 |
| FBgn0032706                                       | Irk3       | 1.71             | 4.87E-93 |
| FBgn0033257                                       | sand       | 1.84             | 3.42E-51 |

| <i>tj<sup>nat/nat</sup> vs tj<sup>nTR/nTR</sup></i> |           |                  |          |
|-----------------------------------------------------|-----------|------------------|----------|
| Gene ID                                             | Gene name | Log2 fold change | p-value  |
| FBgn0037801                                         | CG3999    | -1.63            | 4.07E-36 |
| FBgn0001187                                         | Hex-C     | -1.56            | 1.46E-74 |
| FBgn0264979                                         | CG4267    | -1.46            | 9.77E-26 |
| FBgn0033792                                         | CG13325   | -1.30            | 1.15E-23 |
| FBgn0039241                                         | CG11089   | -1.27            | 1.18E-25 |
| FBgn0038467                                         | AdSL      | -1.20            | 1.73E-26 |
| FBgn0029831                                         | CG5966    | -1.16            | 1.57E-17 |
| FBgn0029823                                         | Shmt      | -1.16            | 4.32E-28 |
| FBgn0033885                                         | DJ-1alpha | -1.03            | 1.77E-18 |

|             |          |      |          |
|-------------|----------|------|----------|
| FBgn0035638 | Tektin-C | 1.04 | 9.79E-14 |
| FBgn0031434 | insv     | 1.06 | 6.34E-16 |
| FBgn0260475 | CG30059  | 1.23 | 6.62E-21 |
| FBgn0035789 | mthl6    | 1.26 | 6.91E-21 |
| FBgn0031435 | Elba2    | 1.41 | 7.74E-25 |
| FBgn0000964 | tj       | 1.43 | 1.85E-63 |
| FBgn0267635 | CR45973  | 1.64 | 4.59E-33 |
| FBgn0267160 | CR45600  | 2.12 | 4.80E-53 |

*tj*<sup>TR/TR</sup> vs *tj*<sup>nTR/nTR</sup>

| Gene ID     | Gene name | Log2 fold change | p-value  |
|-------------|-----------|------------------|----------|
| FBgn0033257 | sand      | -2.48            | 1.39E-53 |
| FBgn0031701 | TotM      | -1.72            | 1.05E-26 |
| FBgn0262881 | CG43236   | -1.70            | 8.72E-27 |
| FBgn0032706 | Irk3      | -1.54            | 9.95E-39 |
| FBgn0032620 | CG12288   | -1.52            | 2.91E-32 |
| FBgn0038083 | CG5999    | -1.48            | 1.21E-26 |
| FBgn0001187 | Hex-C     | -1.44            | 2.66E-55 |
| FBgn0032754 | CG10700   | -1.42            | 5.76E-20 |
| FBgn0032684 | CG10178   | -1.26            | 2.42E-23 |
| FBgn0050090 | CG30090   | -1.13            | 1.80E-12 |
| FBgn0034512 | CG18067   | -1.10            | 5.10E-36 |
| FBgn0044810 | TotX      | -1.10            | 4.69E-12 |
| FBgn0040349 | CG3699    | -1.09            | 5.51E-13 |
| FBgn0002939 | ninaD     | -1.08            | 5.47E-12 |
| FBgn0020513 | ade5      | -1.01            | 3.76E-20 |
| FBgn0053310 | CG33310   | 1.00             | 2.67E-10 |
| FBgn0013688 | mt:srRNA  | 1.00             | 3.25E-10 |
| FBgn0260446 | GABA-B-R1 | 1.09             | 3.45E-20 |



|             |            |      |          |
|-------------|------------|------|----------|
| FBgn0051832 | CG31832    | 1.10 | 2.44E-12 |
| FBgn0050083 | CG30083    | 1.31 | 4.84E-16 |
| FBgn0000964 | tj         | 1.61 | 6.37E-59 |
| FBgn0013680 | mt:ND2     | 1.74 | 1.17E-29 |
| FBgn0013683 | mt:ND4L    | 1.79 | 4.80E-29 |
| FBgn0267635 | CR45973    | 1.92 | 1.16E-32 |
| FBgn0035638 | Tektin-C   | 2.33 | 1.52E-51 |
| FBgn0013673 | mt:ATPase8 | 2.76 | 9.95E-76 |

---

Table S4. List of primers used for psiCHECK™-2 vector modification

| Name    | Primer Sequence 5' to 3'                 | Comments                                                      |
|---------|------------------------------------------|---------------------------------------------------------------|
| CM135_F | ATGGCCGATGCTAAGAACATTAAG                 | Amplification of psiCHECK™-2 template at Fluc start           |
| CM138_R | GTTGGTGGCGCCGGAGCCCTGCTCGTTCTT<br>CAGCAC | Insertion of 1-18 bp of P2A after Rluc stop                   |
| CM141_F | GAGGAGAACCCCGGCCCCATGGCCGATGCT<br>AAGAAC | Insertion of 49-66 bp of P2A before Fluc start                |
| CM146_F | CAGGCCGGCGACGTGGAGGAGAACCCCGG<br>CC      | Insertion of 34-48 bp of P2A                                  |
| CM147_R | CTTCAGCAGGGAGAAGTTGGTGGCGCCGGA<br>GCC    | Insertion of 19-33 bp of P2A                                  |
| PK27_F  | GCCGATGCTAAGAACATTAAGAAGGGC              | Deletion of Fluc AUG from modified psiCHECK™-2 P2A constructs |
| PK28_R  | GGGGCCGGGGTTCTCC                         |                                                               |

Table S5. List of primers used for generating dual luciferase constructs for candidate TR genes

| Name    | Primer sequence 5' to 3'                               | Comments                                                                                                  |
|---------|--------------------------------------------------------|-----------------------------------------------------------------------------------------------------------|
| PK96_F  | GTGCTGAAGAACGAGCAGCTGAGCTTGTACGACG<br>ATCGGATG         | Insertion of <i>wit</i> TR motif into psiCHECK™ -<br>2 vector with 18 bp overhang for Gibson<br>cloning   |
| PK97_R  | GTTGGTGGCGCCGGAGCCGTTCTGCTGCATTCTGA<br>TTAGTTTATAGCTCC |                                                                                                           |
| PK100_F | GTGCTGAAGAACGAGCAGAACGGAGCCTACCACC<br>ACGG             | Insertion of <i>dsx</i> TR motif into psiCHECK™<br>-2 vector with 18 bp overhang for Gibson<br>cloning    |
| PK101_R | GTTGGTGGCGCCGGAGCCGACAGCGGCCGCTGC                      |                                                                                                           |
| PK102_F | GTGCTGAAGAACGAGCAGCAATTGCAGCCGCAAC<br>AC               | Insertion of <i>fru</i> TR motif into psiCHECK™ -<br>2 vector with 18 bp overhang for Gibson<br>cloning   |
| PK103_R | GTTGGTGGCGCCGGAGCCGGGGTCATCGGGACG<br>C                 |                                                                                                           |
| PK104_F | GTGCTGAAGAACGAGCAGATGACACGCTCCAAGA<br>GCC              | Insertion of <i>khc-73</i> TR motif into<br>psiCHECK™ -2 vector with 18 bp<br>overhang for Gibson cloning |
| PK105_R | GTTGGTGGCGCCGGAGCCCCTGCAATTAGTCCAA<br>CGCTGCAGC        |                                                                                                           |
| PK106_F | GTGCTGAAGAACGAGCAGGCAGCTGCAGCATCAG<br>CAGCGG           | Insertion of <i>chinmo</i> TR motif into<br>psiCHECK™ -2 vector with 18 bp<br>overhang for Gibson cloning |
| PK107_R | GTTGGTGGCGCCGGAGCCCTCCTTGTGGCGTTC<br>ATGACTACTGA       |                                                                                                           |
| PK108_F | GTGCTGAAGAACGAGCAGCTAACCCTGGGTGGAC<br>CCATG            | Insertion of <i>klu</i> TR motif into psiCHECK™ -<br>2 vector with 18 bp overhang for Gibson<br>cloning   |
| PK109_R | GTTGGTGGCGCCGGAGCCACAGGTCATAAATGGT<br>CTGGATGCTG       |                                                                                                           |
| PK110_F | GTGCTGAAGAACGAGCAGCAGCAGCAGCAACAGT<br>C                | Insertion of <i>br</i> TR motif into psiCHECK™ -<br>2 vector with 18 bp overhang for Gibson<br>cloning    |
| PK111_R | GTTGGTGGCGCCGGAGCCGGAGTTGTTGAGCGCC<br>AC               |                                                                                                           |
| PK114_F | GTGCTGAAGAACGAGCAGGATATGCTGCTGAGCG<br>GCAAC            | Insertion of <i>svp</i> TR motif into psiCHECK™<br>-2 vector with 18 bp overhang for Gibson<br>cloning    |
| PK115_R | GTTGGTGGCGCCGGAGCCAGTTGTTGTCAATTGG<br>CGCCACATCGTG     |                                                                                                           |
| PK156_F | AATCAGCAGCAACTCTTGCAGC                                 | UAAG to UAAA mutation in <i>br</i> TR motif<br>using blunt end ligation                                   |
| PK155_R | TTATAAGAAGTCCATGCACGGTTTGACAATGC                       |                                                                                                           |

|         |                                    |                                                                          |
|---------|------------------------------------|--------------------------------------------------------------------------|
| PK158_F | TCGATCAGCAGCAACTCTTGCAGC           | UAA to UUC mutation in <i>br</i> TR motif using blunt end ligation       |
| PK157_R | ATAAGAAGTCCATGCACGGTTTGACAATGC     |                                                                          |
| PK160_F | AAAAGCAGCCGCAACAGC                 | UAGG to UAAA mutation in <i>chinmo</i> TR motif using blunt end ligation |
| PK159_R | TATGGTGAATGATTGCTGGCTGCC           |                                                                          |
| PK162_F | TCGAAGCAGCCGCAACAG                 | UAA to UUC mutation in <i>chinmo</i> TR motif using blunt end ligation   |
| PK161_R | ATGGTGAATGATTGCTGGCTGC             |                                                                          |
| PK164_F | AAAGTATCGCAACGTTGCTGC              | UAGC to UAAA mutation in <i>dsx</i> TR motif using blunt end ligation    |
| PK163_R | TACGTGGCAGCCGTGGAG                 |                                                                          |
| PK166_F | TCCAGTATCGCAACGTTGCTG              | UAG to UUC mutation in <i>dsx</i> TR motif using blunt end ligation      |
| PK165_R | ACGTGGCAGCCGTGGA                   |                                                                          |
| PK168_F | AAAACAGTCAGTACCTGGGCTGGA           | UGAU to UAAA mutation in <i>fru</i> TR motif using blunt end ligation    |
| PK167_R | ATTCACTTGTGGCATTGTGCTGC            |                                                                          |
| CM183_F | TCTACAGTCAGTACCTGGGCTGGAACCTACGGCG | UGA to UUC mutation in <i>fru</i> TR motif using blunt end ligation      |
| CM184_R | ATTCACTTGTGGCATTGTGCTGCTGCTG       |                                                                          |
| PK176_F | AAATGTACCCAAAGTGTTTCGCATCAG        | UGAU to UAAA mutation in <i>khc-73</i> TR motif using blunt end ligation |
| PK175_R | ATTTACGCGCCGAAAGGTTTAGC            |                                                                          |
| PK178_F | TCTTGTACCCAAAGTGTTTCGCATCAGC       | UGA to UUC mutation in <i>khc-73</i> TR motif using blunt end ligation   |
| PK177_R | ATTTACGCGCCGAAAGGTTTAGC            |                                                                          |
| PK180_F | AGGTGTCTGTATGCAGCAGC               | UAAC to UAAA mutation in <i>klu</i> TR motif using blunt end ligation    |
| PK179_R | TTAGGCGCTCTCCGTCTTGACAAC           |                                                                          |
| PK182_F | TCCGGTGTCTGTATGCAGCAGC             | UAA to UUC mutation in <i>klu</i> TR motif using blunt end ligation      |
| PK181_R | AGGCGCTCTCCGTCTTGAC                |                                                                          |
| PK188_F | AAATGCCTTCGATGTGACACACGA           | UGAC to UAAA mutation in <i>svp</i> TR motif using blunt end ligation    |
| PK187_R | AGGCCAGGAGAAACTGTTGC               |                                                                          |
| PK190_F | TCCTGCCTTCGATGTGACACACG            | UGA to UUC mutation in <i>svp</i> TR motif using blunt end ligation      |
| PK189_R | AGGCCAGGAGAAACTGTTGC               |                                                                          |
| PK192_F | AAAATGAGGAGGTTCTGCTGC              | UAGC to UAAA mutation in <i>wit</i> TR motif using blunt end ligation    |
| PK191_R | AGAGAATGTTGAGCAGGGAGGAGT           |                                                                          |

---

|         |                                             |                                                                     |
|---------|---------------------------------------------|---------------------------------------------------------------------|
| PK194_F | TCCATGAGGAGGTTCTGCTGC                       | UAG to UUC mutation in <i>wit</i> TR motif using blunt end ligation |
| PK193_R | AGAGAATGTTGAGCAGGGAGGAGT                    |                                                                     |
| PK545_F | TAGCAATTACAGATTGAGCTCGGCTCCGGCGCCAC<br>C    |                                                                     |
| PK546_F | TGACAATTACAGATTGAGCTCGGCTCCGGCGCCAC<br>C    | Insertion of TMV RT sequence into psiCHECK-P2A vector.              |
| PK547_F | TAACAATTACAGATTGAGCTCGGCTCCGGCGCCAC<br>C    |                                                                     |
| PK548_F | TTCCAATTACAGATTGAGCTCGGCTCCGGCGCCAC<br>C    | Each forward primer contains the desired mutation.                  |
| PK549_R | TTGTGTTCCCTGCGGATCCCTGCTCGTTCTTCAGCA<br>CGC |                                                                     |

---



Table S6. List of primers used for preparing constructs for CRISPR/Cas9 injections

| Name    | Primer sequence 5' to 3'                                                                                            | Comments                                                                                                                        |
|---------|---------------------------------------------------------------------------------------------------------------------|---------------------------------------------------------------------------------------------------------------------------------|
| PK241_F | GAGAGCTTTGGCTATCGCCGCGTTTTAGAGCTA<br>GAAATAGC                                                                       | Insertion of proximal PAM site at 5' end of gRNA scaffold in pU6-BbsI-chiRNA vector                                             |
| PK242_F | GACACAATGTATAAGGTAAATGTTTTAGAGCTA<br>GAAATAGC                                                                       | Insertion of distal PAM site at 5' end of gRNA scaffold in pU6-BbsI-chiRNA vector                                               |
| PK243_R | GAAGTATTGAGGAAAACATA                                                                                                | Reverse amplification of pU6-BbsI-chiRNA for PAM insertion                                                                      |
| PK77_F  | ATATGCACACCTGCGATCGGTGAACACATCTTC<br>GGG                                                                            | Amplification of HA1+TfR from gDNA with 18 bp overhangs for Gibson assembly                                                     |
| PK135_R | TGAATTAGATCCCGTACGTACCTTATACATTGTG<br>TCTAGGAAAAGC                                                                  |                                                                                                                                 |
| PK132_F | CGTACGGGATCTAATTCAATTAGAGACTAATTC<br>AATTAGAG                                                                       | Amplification of pH-DsRed without loxP1 and attP site for HA1+TfR insertion                                                     |
| PK71_R  | GATCGCAGGTGTGCATATGTCCG                                                                                             |                                                                                                                                 |
| PK153_F | TAAGTAGAGAGCGTTCCGTGTTTAAGG                                                                                         | Amplification of pH-DsRed for 3xFlag insertion                                                                                  |
| PK154_R | GTTGACCAGCTGCTGGGGATTC                                                                                              |                                                                                                                                 |
| PK147_F | CCCCAGCAGCTGGTCAACGACTACAAGGACCA<br>CGACGGTGACTACAAGGACCACGACATCGACT<br>ACAAGGACGACGACGACAAGTAAGTAGAGAGC<br>GTTCCG  | Insertion of 3xFlag upstream of tj second stop codon by Gibson assembly                                                         |
| PK148_R | CGGAACGCTCTCTACTTACTTGTCTGTCGTCGTC<br>CTTGTAGTCGATGTCGTGGTCCTTGTAGTCACC<br>GTCGTGGTCCTTGTAGTCGTTGACCAGCTGCTG<br>GGG |                                                                                                                                 |
| PK207_F | TGTATGCTATACGAAGTTATAATTGGTTTGATTC<br>CAAGAATGTTTTTC                                                                | Amplification of HA2 from gDNA with 18 bp overhangs for Gibson assembly                                                         |
| PK208_R | ATCTTTACTAGTGCTCTTCTCGCGTGTGTTTCTT<br>CTAG                                                                          |                                                                                                                                 |
| PK209_F | AGAAGAGCACTAGTAAAGATCTCCATGC                                                                                        |                                                                                                                                 |
| PK210_R | ATAACTTCGTATAGCATAATTATACGAAGTTAT<br>ACCG                                                                           | Amplification of pH-DsRed for HA2 insertion                                                                                     |
| PK83_F  | CAACCGCGGGCGGAGATAGCCAAAG                                                                                           | Introduction of synonymous point mutations at proximal PAM site in the HA1+TfR cloned pH-DsRed vector by QuikChange mutagenesis |
| PK84_R  | CTTTGGCTATCTCCGCCCGCGGTTG                                                                                           |                                                                                                                                 |
| PK21_F  | GGAATTCTACCTCTCCGCCAGCTGGCGG                                                                                        |                                                                                                                                 |

|         |                               |                                                                                                  |
|---------|-------------------------------|--------------------------------------------------------------------------------------------------|
| PK22_R  | CCGCCAGCTGGCGGAAGAGGTAGAATTCC | Mutation of <i>tj</i> stop codon UGA to sense codon UUC coding for Phe by QuikChange mutagenesis |
| PK229_F | TAATAATAACGCCAGCTGGCGGTGG     | Insertion of UAUAAUAA after <i>tj</i> stop codon UGA by blunt-end ligation                       |
| PK230_R | TCAGAGGTAGAATTCCGGAGAGCTTTGGC |                                                                                                  |
| PK277_F | CGAAATCTAAGAAACCGGCATCGAAG    | Generation of gDNA amplicon for sequencing                                                       |
| PK278_R | GGTGGTAATGGGAATGCACTTCTCTTG   |                                                                                                  |
| PK279_F | GCGACGCACCCTGAAGAATCG         | Sequencing primer for genotyping mutants                                                         |

Table S7. List of primers used for qPCR

| <b>Flybase ID</b>  | <b>Gene</b>                      | <b>Primer sequence (5' to 3')</b>                                   |
|--------------------|----------------------------------|---------------------------------------------------------------------|
| <b>FBgn0000964</b> | <i>tj</i>                        | Forward: GGCGGTAAATGGACGACAAT<br>Reverse: AAGGACCTCAGCTTGATGTGC     |
| <b>FBgn0031424</b> | <i>VGlut</i>                     | Forward: CCTTCGGCATGAGGTGCAATA<br>Reverse: CGAGTCCACATGGCTCTCC      |
| <b>FBgn0003884</b> | <i><math>\alpha</math>Tub84B</i> | Forward: CACACCACCCTGGAGCATTG<br>Reverse: CCAATCAGACGGTTCAGGTTG     |
| <b>FBgn0033257</b> | <i>sand</i>                      | Forward: GGTTTATAGCACGGAACCTCAGT<br>Reverse: GGTGGTCGAAGAAGCTGATGT  |
| <b>FBgn0027348</b> | <i>bgm</i>                       | Forward: TGGACAAGATTCACGCCATTG<br>Reverse: CGACCACCTGTAGTAGCCATC    |
| <b>FBgn0032706</b> | <i>lrk3</i>                      | Forward: CTGCCACGGATTCCCTAACC<br>Reverse: CCGTCTCCTTTTCGGAGGAAC     |
| <b>FBgn0002939</b> | <i>ninaD</i>                     | Forward: TGTGGGGTGACCCAACAAAAG<br>Reverse: CCCTGAGCTATAAAGCCAGGC    |
| <b>FBgn0039678</b> | <i>Obp99a</i>                    | Forward: TTGCCATCTGCGTGCTGATT<br>Reverse: TTGGGGTACTCCCCTTCTGG      |
| <b>FBgn0260446</b> | <i>GABA-B-R1</i>                 | Forward: AACCGCAAAGCTGATGCTG<br>Reverse: CCGTAGCAGAGCACAATTAGATT    |
| <b>FBgn0053310</b> | <i>CG33310</i>                   | Forward: GAGCAACGCGAATCAACTAACG<br>Reverse: ATCTTGGAACCCTTCACTTCATC |
| <b>FBgn0053200</b> | <i>VepD</i>                      | Forward: CCAGGAACATACACGCTCCAC<br>Reverse: CAAGGGCCTCCCAGTGAAG      |
| <b>FBgn0029823</b> | <i>Shmt</i>                      | Forward: CTTGACGCACGGTTTCTTCAC<br>Reverse: TCTCCGGGTTCACTTTGTACG    |
| <b>FBgn0001187</b> | <i>Hex-C</i>                     | Forward: CCCGGTGTGGACCTATTG<br>Reverse: GTGGCAGATATGCGGTCTTCA       |
| <b>FBgn0019940</b> | <i>Rh6</i>                       | Forward: TACCTCGTCGAAGGGACTG                                        |

|                    |                                                                                   |                                                                                                                                    |
|--------------------|-----------------------------------------------------------------------------------|------------------------------------------------------------------------------------------------------------------------------------|
|                    |                                                                                   | Reverse: GGGAACATGGTGAACATCATCA                                                                                                    |
| <b>FBgn0023001</b> | <i>melt</i>                                                                       | Forward: CAAACGCGATCTCTCAAGAGC<br>Reverse: ATCGGACTGATCTCGGAAAGC                                                                   |
| <b>FBgn0011739</b> | <i>wt5</i>                                                                        | Forward: CAAGCAGGACCTAACCCGATT<br>Reverse: CGTGTATCGCAGAGGTGTGTA                                                                   |
| <b>FBgn0036974</b> | <i>eRF1</i> (universal)<br><i>eRF1A/B/C/E/F/G</i><br><i>eRF1H</i><br><i>eRF1I</i> | Forward: CACGGATAAGTCCCAGGAAGG<br>Reverse: CCAATTCATCGAGCTGCATACTC<br>Reverse: CTCATCGGCCTGTAGGGAT<br>Reverse: GTCCACGTGCATTGCCAAC |
| <b>FBgn0020443</b> | <i>eRF3A/B/D</i><br><i>eRF3C</i><br><i>eRF3</i> (universal)                       | Forward: TCAACCCCTCGGACAAAATCG<br>Forward: CGGATCTCGCTACATTTACTCG<br>Reverse: CCCTCCGTGAACTCAGCATC                                 |
| <b>FBgn0037249</b> | <i>eIF3-S10</i>                                                                   | Forward: CCCGCTATACGCAACGTCC<br>Reverse: GGCATAGTTCATCGCTTGTT                                                                      |
| <b>FBgn0034237</b> | <i>eIF3-S9</i>                                                                    | Forward: GAAGCTGAAGTTGGTCATCAACA<br>Reverse: TCTGGCCTGCTTGTACTCCA                                                                  |
| <b>FBgn0265297</b> | <i>pAbp</i>                                                                       | Forward: GCTATGCCTACGTCAACTTCC<br>Reverse: CTTGTTGCGAACCCAGGTCAA                                                                   |
| <b>FBgn0086706</b> | <i>pix</i>                                                                        | Forward: CTGTGCATCGGTTGCGGTAT<br>Reverse: TGCAGCTTGAAGGAGTTCTTG                                                                    |
| <b>FBgn0033316</b> | <i>Gle1</i>                                                                       | Forward: AGGATCGGGAACCTATATGGG<br>Reverse: GAATCTCGTTATTGGGCTCTGG                                                                  |
| <b>FBgn0024804</b> | <i>Dbp80</i>                                                                      | Forward: TCTGGAGAAGAAACCGATTTCCG<br>Reverse: ACCAGCCCTTTCTAGTATTT                                                                  |
| <b>FBgn0005649</b> | <i>Rox8</i>                                                                       | Forward: CAGCTCTGACCGCCATGAATA<br>Reverse: TGATGTCTGTCTTCGGCTGAT                                                                   |

Table S8. List of primers for tRNA quantification

| Gene                                | Primer sequence (5' to 3')                            |
|-------------------------------------|-------------------------------------------------------|
| <b>Primers for cDNA preparation</b> |                                                       |
| ArgUCG                              | GTCGTATCCAGAATTTGTTGCAACGAACAGGTCTGGATACGACTCGTGACAGG |
| ArgUCU                              | GTCGTATCCAGAATTTGTTGCAACGAACAGGTCTGGATACGACTCGAACCCGC |
| CysGCA1                             | GTCGTATCCAGAATTTGTTGCAACGAACAGGTCTGGATACGACTGACACCCGG |
| CysGCA2,3,4                         | GTCGTATCCAGAATTTGTTGCAACGAACAGGTCTGGATACGACTGGCACCCGG |
| TrpCCA                              | GTCGTATCCAGAATTTGTTGCAACGAACAGGTCTGGATACGACTACCCCGACG |
| PheGAA                              | GTCGTATCCAGAATTTGTTGCAACGAACAGGTCTGGATACGACTCGAAACCCG |
| 18S rRNA                            | GTCGTATCCAGAATTTGTTGCAACGAACAGGTCTGGATACGACTCCTTCCGCA |
| <b>Primers for qPCR</b>             |                                                       |
| ArgUCG                              | Forward: GGATAAGGCGTCCGACTTCCG                        |
| ArgUCU1,2                           | Forward: GGATAGCGCGTTGGACTTCT                         |
| ArgUCU3                             | Forward: CTAATGGATAAGGCGTCCGATTTCT                    |
| CysGCA                              | Forward: GCTCAGGGGTAGAGCATTTCGACTGCA                  |
| TrpCCA1                             | Forward: CGGTAGCGCGTCTGACTCCA                         |
| TrpCCA2                             | Forward: GGTAGCGCGTCCGACTCCA                          |
| PheGAA                              | Forward: CAGTTGGGAGAGCGTTAGACTGAA                     |
| 18S rRNA                            | Forward: GGAAGTAAAAGTCGTAACAAGGTTTCCG                 |
| Universal                           | Reverse: GTTGCAACGAACAGGTCTGGATACG                    |



Table S9. List of primers construction of pUb expression vectors

| Name    | Primer sequence 5' to 3'                                  | Comments                                                         | Flybase ID  |
|---------|-----------------------------------------------------------|------------------------------------------------------------------|-------------|
| PK528_F | GATCCACCGGTCGCCACCATG<br>TCTGGCGAGGAAACGTC                | Cloning of eRF1 isoforms into pUb vector.<br>Forward (universal) |             |
| PK529_R | AAAGATCCTCTAGACTAGCTA<br>GTAATCATCTAGATCGAAGCC<br>ATCATTG | Cloning of <i>eRF1-RA</i>                                        | FBtr0078177 |
| PK530_R | AAAGATCCTCTAGACTAGTTAA<br>TAGTCATCGAGATCGACATCC<br>TCCAG  | Cloning of <i>eRF1-RH</i>                                        | FBtr0331817 |
| PK574_F | GATCCACCGGTCGCCACCATG<br>GGTGATTGGGCTAAAAAAGC             | Cloning of <i>Dbp80-RB</i> into pUb vector                       | FBtr0113715 |
| PK575_R | AAAGATCCTCTAGACTAGTCA<br>GAAAAGCTTCCTTTTGCC               |                                                                  |             |
| PK576_F | GATCCACCGGTCGCCACCATG<br>GACGACATGATGCG                   | Cloning of <i>gle-RA</i> into pUb vector                         | FBtr0088695 |
| PK577_R | AAAGATCCTCTAGACTAGCTAC<br>CAAAATCCTGGAGGC                 |                                                                  |             |
| PK578_F | GATCCACCGGTCGCCACCATG<br>GCTTCTCTATACGTCGGTG              | Cloning of <i>pAbp-RA</i> into pUb vector                        | FBtr0086738 |
| PK579_R | AAAGATCCTCTAGACTAGTTAG<br>TTGGCGGGCTCGG                   |                                                                  |             |
| PK580_F | GATCCACCGGTCGCCACCATG<br>TCGCGCAGAAAGGAGAAC               | Cloning of <i>pix-RA</i> into pUb vector                         | FBtr0076557 |
| PK581_R | AAAGATCCTCTAGACTAGTTAG<br>TTGCAGGCTTCGTCCTC               |                                                                  |             |
| PK582_F | GATCCACCGGTCGCCACCATG<br>GACGAGTCGCAAC                    | Cloning of <i>Rox8-RD</i> into pUb vector                        | FBtr0084591 |
| PK583_R | AAAGATCCTCTAGACTAGTCAT<br>TGGGTCTGGTATTGTGGCATC           |                                                                  |             |
